# Supplementary material for: An advanced Ag-based photocatalyst Ag2Ta4O11 with outstanding activity, durability and universality for removing organic dyes
Source: Royal Society of Chemistry journal article supplement (doi:10.1039/c4cp03494e), 2014-01-01
Supplement: c4cp03494e1.pdf [file c4cp03494e1.pdf]

## Supporting Information

### An advanced Ag-based photocatalyst Ag<sub>2</sub>Ta<sub>4</sub>O<sub>11</sub> with outstanding activity, durability and universality for removing organic dyes

Hongjun Dong<sup>a,b</sup> Gang Chen,<sup>\*a</sup> Jingxue Sun,<sup>\*a</sup> Chunmei Li,<sup>a</sup> Yidong Hu,<sup>a</sup> and Chade Lv<sup>a</sup>

<sup>a</sup> Department of Chemistry, Harbin Institute of Technology, Harbin 150001, P. R. China

<sup>b</sup> Department of Chemistry, Baicheng Normal University, Baicheng 137000, P. R. China

E-mail: gchen@hit.edu.cn, skybluesnow@163.com Fax: (+86)-451-86413753

The band edge of photocatalyst can be estimated according to the equations  $\alpha h\nu = A(h\nu - E_g)^{n/2}$ ,<sup>1</sup> in which  $\alpha$ ,  $\nu$ ,  $A$  and  $E_g$  are absorption coefficient, light frequency, proportionality constant and band gap, respectively.  $n = 1$  and  $n = 4$  decide the characteristics of the direct and indirect transition in the semiconductor. Using an approximate  $E_g$  value (3.95 eV) and the plot of  $\ln(\alpha h\nu)$  vs  $\ln(h\nu - E_g)$ , we deduce the slope of Ag<sub>2</sub>Ta<sub>4</sub>O<sub>11</sub> is about equal to 1 and the corresponding value of  $n$  is 2. It indicates the Ag<sub>2</sub>Ta<sub>4</sub>O<sub>11</sub> samples exhibit the indirect band gap as well as direct transition characteristics.<sup>2</sup> Therefore, as shown the plots of  $(\alpha h\nu)^{2/n}$  vs  $h\nu$ , when  $n = 4$  and  $n = 1$ , the indirect and direct band gaps of Ag<sub>2</sub>Ta<sub>4</sub>O<sub>11</sub> are 3.82 eV and 4.04 eV, respectively.

The band positions of Ag<sub>2</sub>Ta<sub>4</sub>O<sub>11</sub> can be calculated by the following empirical formulae:

$$E_{CB} = X - E_c - 1/2E_g$$

$$E_{VB} = E_{CB} + E_g$$

where  $X$  is the absolute electronegativity of the atom semiconductor, expressed as the geometric mean of the absolute electronegativity of the constituent atoms, which is defined as the arithmetic mean of the atomic electron affinity and the first ionization energy;  $E_c$  is the energy of free electrons of the hydrogenscale (4.5 eV);  $E_g$  is the band gap of the semiconductor;  $E_{CB}$  is the conduction band potential and  $E_{VB}$  is the valence band potential. The values of  $X$ ,  $E_g$ ,  $E_{CB}$ , and  $E_{VB}$  of the Ta<sub>2</sub>O<sub>5</sub> and Ag<sub>2</sub>Ta<sub>4</sub>O<sub>11</sub> samples are shown in Table S1.

**Table S1**  $X$ ,  $E_g$ ,  $E_{CB}$ , and  $E_{VB}$  of Ag<sub>2</sub>Ta<sub>4</sub>O<sub>11</sub> and Ta<sub>2</sub>O<sub>5</sub> samples

| Semiconductor                                   | $X$ (eV) | $E_g$ (eV) | $E_{CB}$ (eV) | $E_{VB}$ (eV) |
|-------------------------------------------------|----------|------------|---------------|---------------|
| Ag <sub>2</sub> Ta <sub>4</sub> O <sub>11</sub> | 6.14     | 3.82       | -0.27         | 3.55          |
| Ta <sub>2</sub> O <sub>5</sub>                  | 6.34     | 4.00       | -0.16         | 3.84          |

Mott-Schottky relationships on n-type and p-type semiconductors are expressed according to the following equations:

$$\frac{1}{C^2} = \left( \frac{2}{\epsilon_0 \epsilon \epsilon_0 N_d} \right) \left[ (E - E_{fb}) - \frac{KT}{e_0} \right], \text{ for n type}$$

$$\frac{1}{C^2} = \left( \frac{2}{\epsilon_0 \epsilon \epsilon_0 N_a} \right) \left[ (-E + E_{fb}) - \frac{KT}{e_0} \right], \text{ for p type}$$

Where  $C$  is the depletion-layer capacitance per unit surface area,  $N_d$  and  $N_a$  are the donor and acceptor densities, respectively,  $\epsilon_0$  is the permittivity of vacuum,  $\epsilon$  is the dielectric constant of the semiconductor,  $E$  is the electrode potential,  $E_{fb}$  is the flat-band potential, and  $KT/e_0$  is the temperature dependent term in the Mott-Schottky equation.

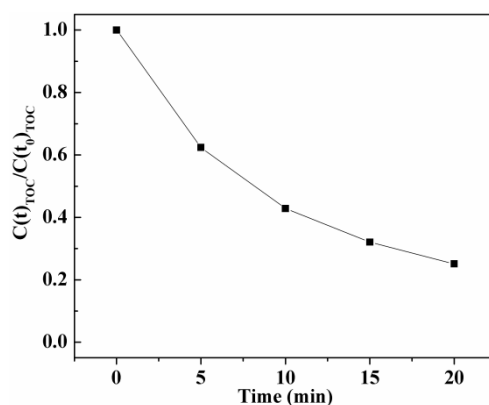

**Fig. S1** Dynamic curves of TOC concentrations in the degrading MB over the  $Ag_2Ta_4O_{11}$  sample under UV-visible light.

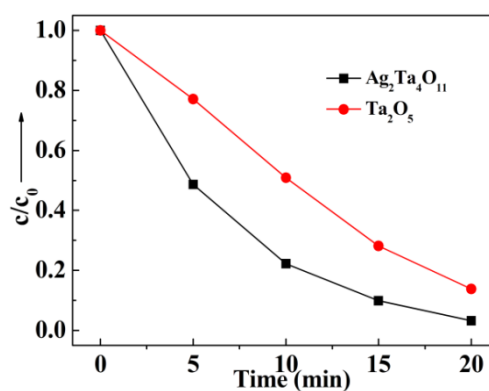

**Fig. S2** Dynamic curves of RhB solution over the  $Ag_2Ta_4O_{11}$  and  $Ta_2O_5$  samples under UV-visible light.

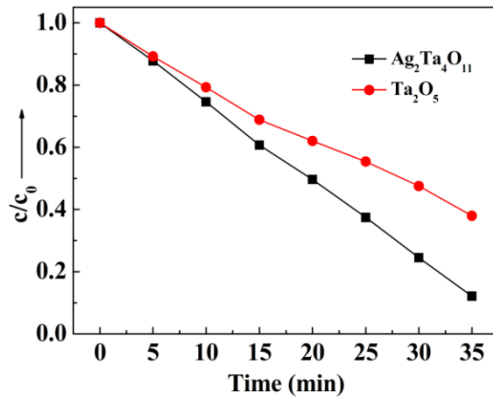

**Fig. S3** Dynamic curves of MO solution over the Ag<sub>2</sub>Ta<sub>4</sub>O<sub>11</sub> and Ta<sub>2</sub>O<sub>5</sub> samples under UV-visible light.

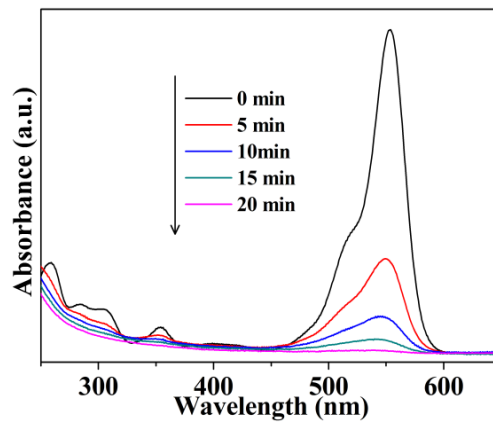

**Fig. S4** Absorbance variations of RhB solution over the Ag<sub>2</sub>Ta<sub>4</sub>O<sub>11</sub> sample under UV-visible light.

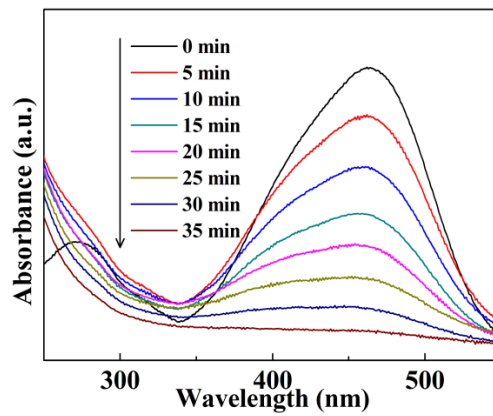

**Fig. S5** Absorbance variations of MO solution over the Ag<sub>2</sub>Ta<sub>4</sub>O<sub>11</sub> sample under UV-visible light.

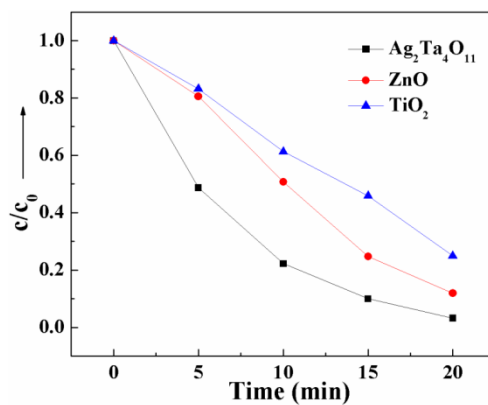

**Fig. S6** Dynamic curves of RhB solution over the  $\text{Ag}_2\text{Ta}_4\text{O}_{11}$ , ZnO and  $\text{TiO}_2$  samples under UV-visible light.

### Reference

1. M. A. Butler, *J. Appl. Phys.* 1977, **48**, 1914-1920.
2. Z. G. Yi, J. H. Ye, N. Kikugawa, T. Kako, S. X. Ouyang, H. Stuart-Williams, H. Yang, J. Y. Cao, W. J. Luo, Z. S. Li, Y. Liu, and R. L. Withers, *Nat. Mater.*, 2010, **9**, 559-563.
